# Supplementary material for: Effect of calcination temperature on the morphology and catalytic properties of ZnO nanostructures fabricated from a chiral precursor for photodegradation of both cationic and anionic dyes
Source: Royal Society of Chemistry journal article supplement (doi:10.1039/d1nj05405h), 2022-01-01
Supplement: d1nj05405h1.pdf [file d1nj05405h1.pdf]

## **Electronic Supplementary Information**

### **Effect of calcination temperature on the morphology and catalytic properties of ZnO nanostructures fabricated from a chiral precursor for photodegradation of both cationic and anionic dyes**

Shradha Gandhi,<sup>‡</sup> Rupinder Kaur,<sup>‡</sup> Vandana Sharma and Sanjay K. Mandal\*

Department of Chemical Sciences, Indian Institute of Science Education and Research Mohali, Sector 81, Manauli PO, S.A.S. Nagar, Mohali, Punjab 140306, INDIA

<sup>‡</sup> These authors contributed equally.

#### **Corresponding Author**

\*E-mail: [sanjaymandal@iisermohali.ac.in](mailto:sanjaymandal@iisermohali.ac.in)

## Table of Contents

| Item(s)      | Description                                                                                                | Page No. |
|--------------|------------------------------------------------------------------------------------------------------------|----------|
| Fig. S1      | TGA pattern of <b>ZnO_1</b>                                                                                | S3       |
| Fig. S2      | TGA pattern of <b>ZnO_3</b>                                                                                | S3       |
| Fig. S3      | FESEM and TEM images of <b>Zn-CBS</b>                                                                      | S4       |
| Fig. S4-S6   | EDX spectra and EDX mapping of <b>ZnO_1, ZnO_2</b> and <b>ZnO_3</b>                                        | S5-S6    |
| Fig. S7-S9   | EDX spectra and EDX mapping of <b>ZnO_1a, ZnO_2a</b> and <b>ZnO_3a</b>                                     | S6-S7    |
| Fig. S10-S12 | EDX spectra and EDX mapping of <b>ZnO_1_2h, ZnO_1_4h</b> and <b>ZnO_1_12h</b>                              | S8-S9    |
| Fig. S13-S14 | EDX spectra and EDX mapping of <b>ZnO_HT</b> and <b>ZnO_HT_1</b>                                           | S9-S10   |
| Fig. S15     | Change in the absorption spectra of the solution of MB in the presence of <b>ZnO_3a</b>                    | S11      |
| Fig. S16     | Change in the absorption spectra of the solution of CR in the presence of <b>ZnO_1a</b>                    | S11      |
| Fig. S17-S18 | Kinetic plot of <b>ZnO_1, ZnO_2</b> and <b>ZnO_3</b> for the degradation of MB and CR dye                  | S12-S13  |
| Fig. S19     | Comparison of rate constants of MB and CR dye                                                              | S14      |
| Table S1-S6  | Percentage decolorization and rate constant of as-synthesized ZnO nanoparticles                            | S15-S20  |
| Table S7     | Comparison of percentage degradation efficiency of MB dye by the ZnO nanostructures with literature values | S21      |
| Table S8     | Comparison of percentage degradation efficiency of CR dye by the ZnO nanostructures with literature values | S22      |
| Fig. S20     | TGA pattern of recycled <b>ZnO_1</b>                                                                       | S23      |
| Fig. S21     | TGA pattern of recycled <b>ZnO_3</b>                                                                       | S23      |

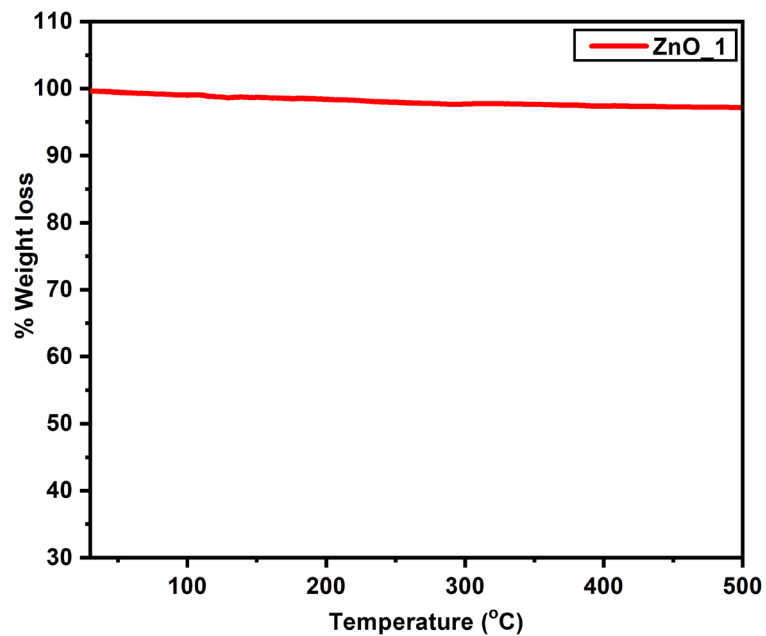

Fig. S1 TGA pattern of ZnO\_1.

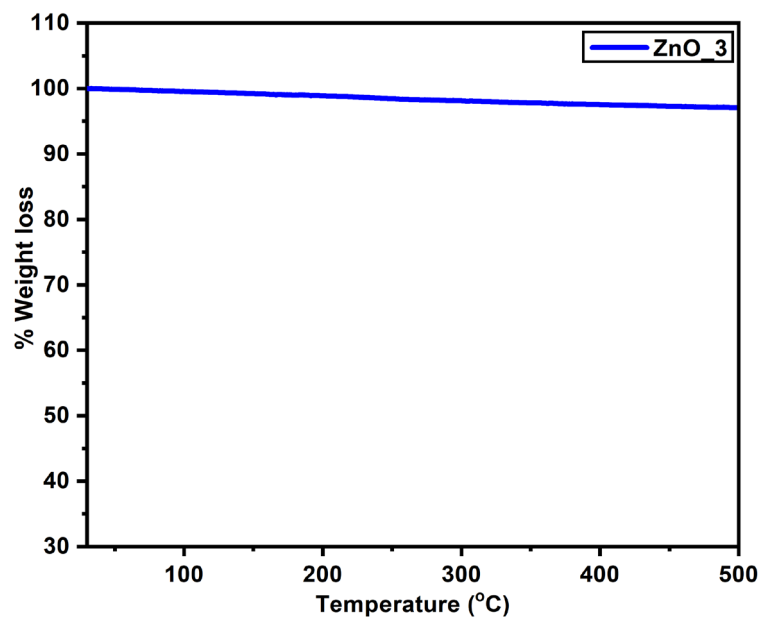

Fig. S2 TGA pattern of ZnO\_3.

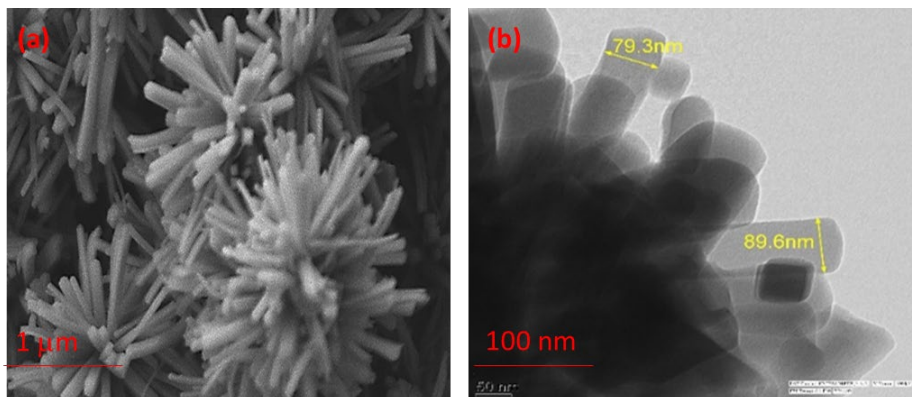

**Fig. S3** (a) FESEM image and (b) TEM image of Zn-CBS.

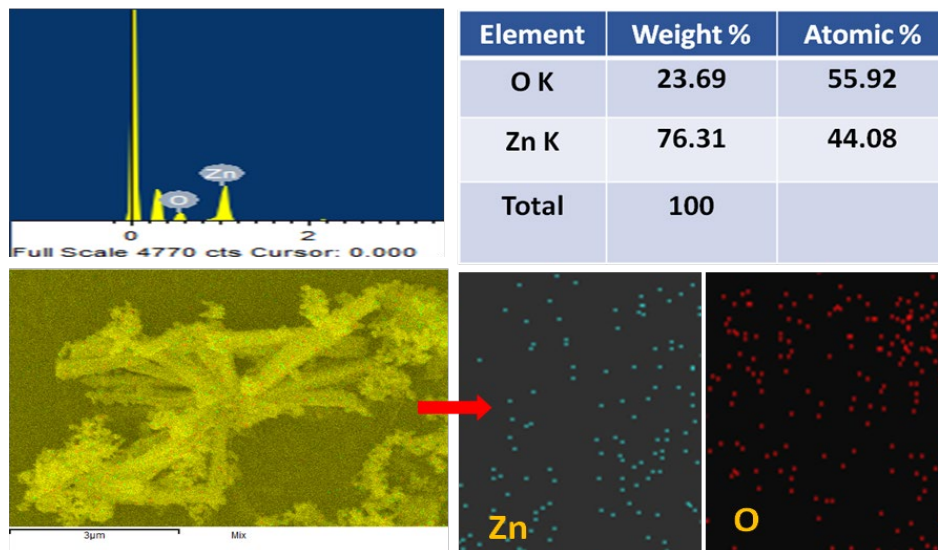

**Fig. S4** EDX spectrum and elemental mapping of ZnO\_1.

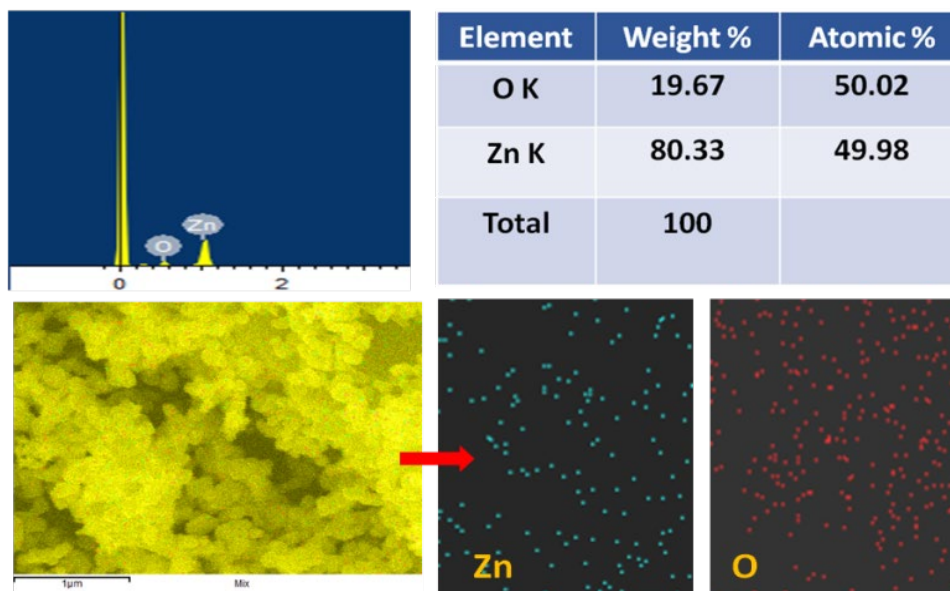

**Fig. S5** EDX spectrum and elemental mapping of ZnO\_2.

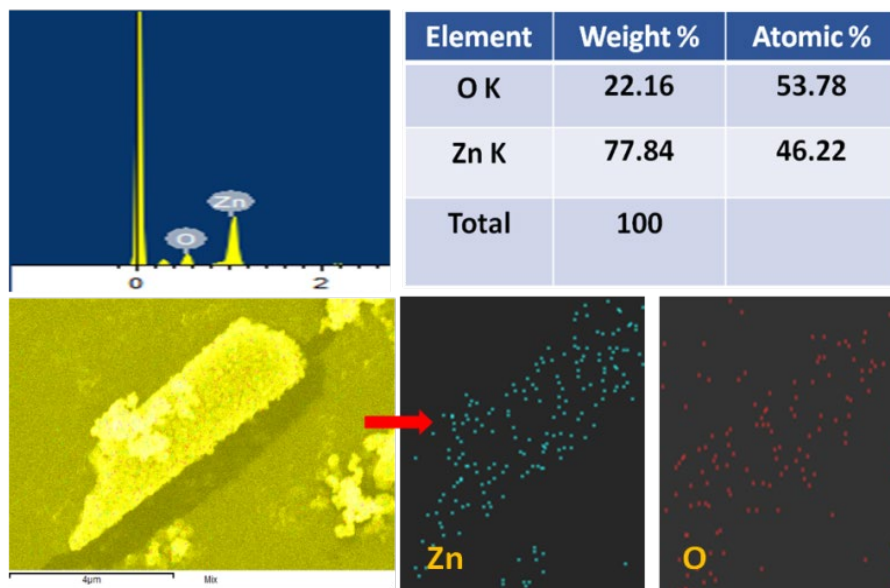

Fig. S6 EDX spectrum and elemental mapping of ZnO<sub>3</sub>.

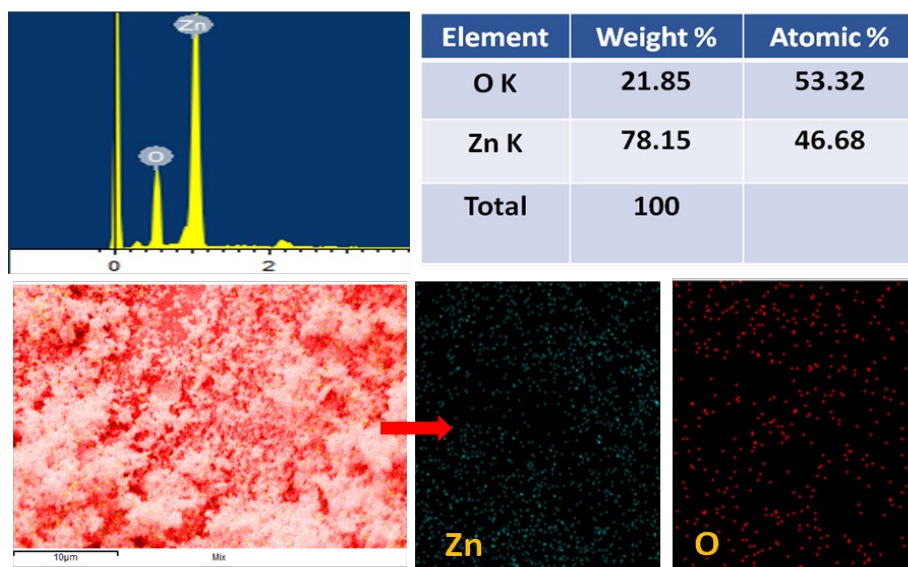

Fig. S7 EDX spectrum and elemental mapping of ZnO<sub>1a</sub>.

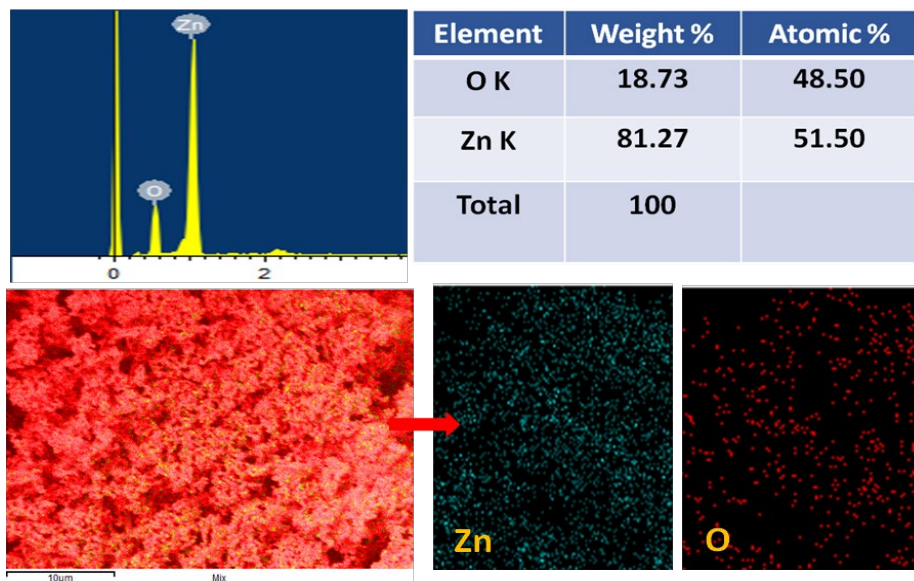

Fig. S8 EDX spectrum and elemental mapping of ZnO\_2a.

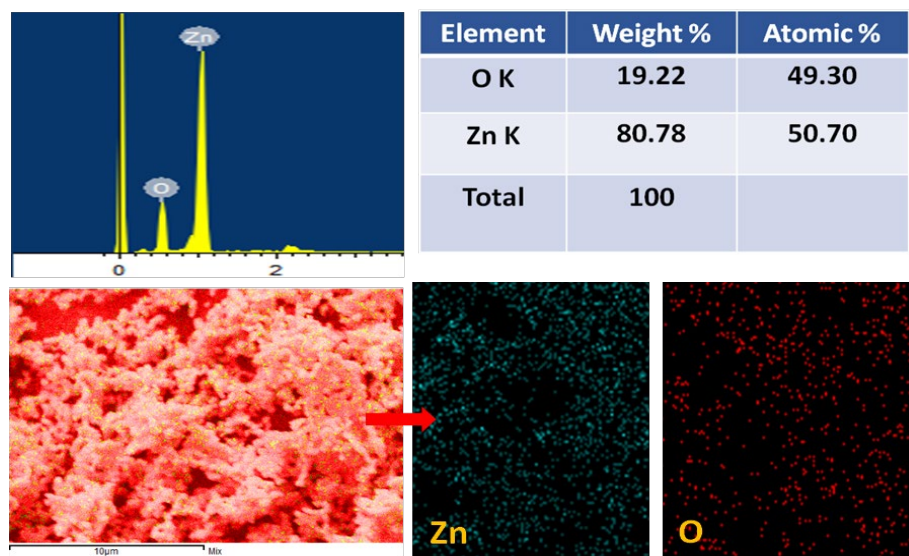

Fig. S9 EDX spectrum and elemental mapping of ZnO\_3a.



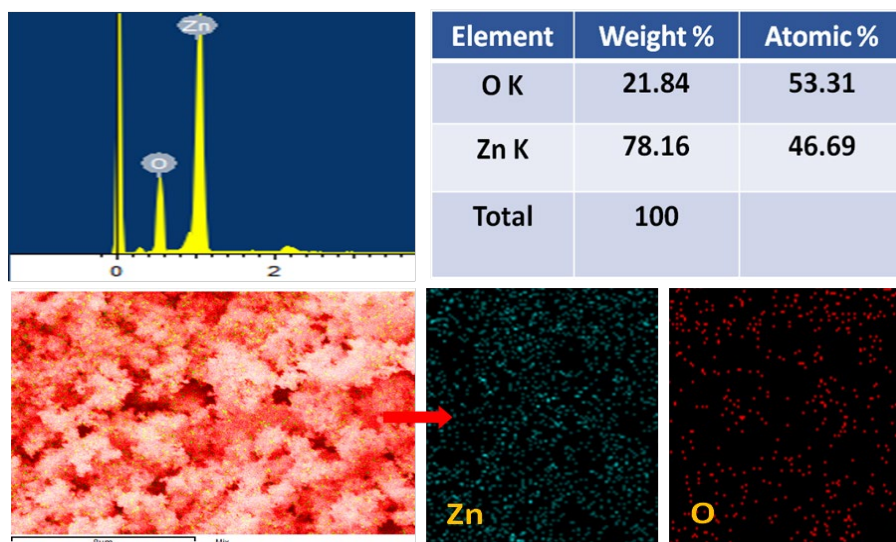

**Fig. S10** EDX spectrum and elemental mapping of **ZnO\_1\_2h** obtained from calcination of **Zn-CBS** at 600 °C for 2 h.

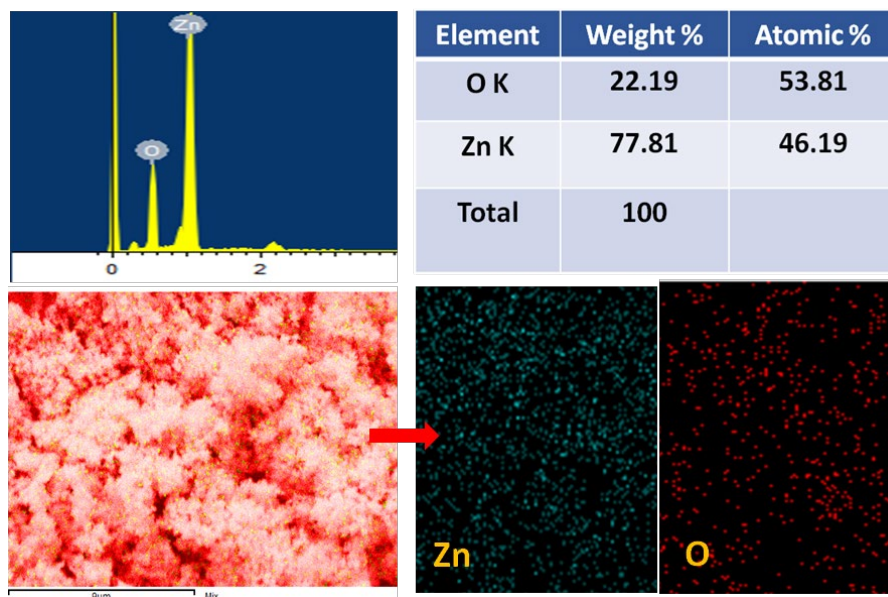

**Fig. S11** EDX spectrum and elemental mapping of **ZnO\_1\_4h** obtained from calcination of **Zn-CBS** at 600 °C for 4 h.



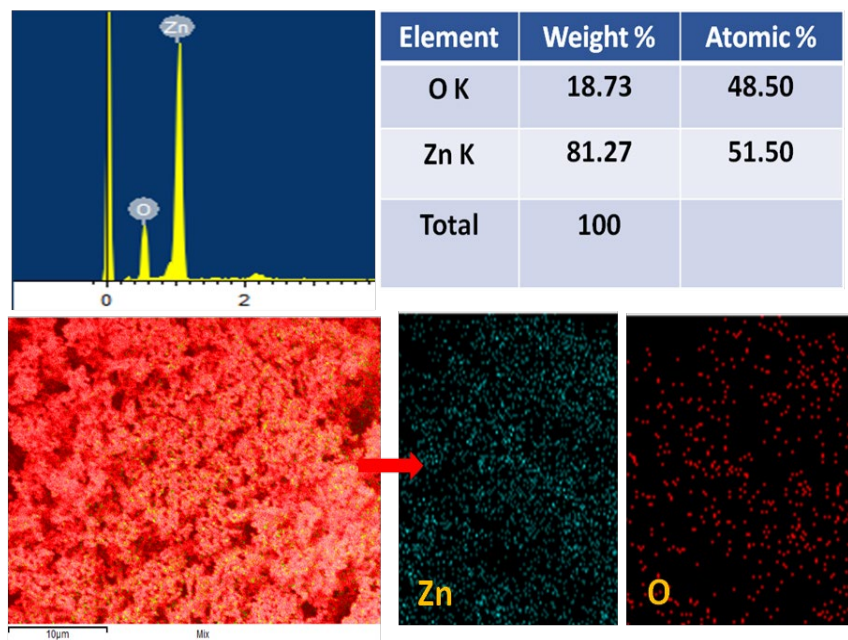

**Fig. S12** EDX spectrum and elemental mapping of **ZnO\_1\_12h** obtained from calcination of Zn-CBS at 600 °C for 12 h.

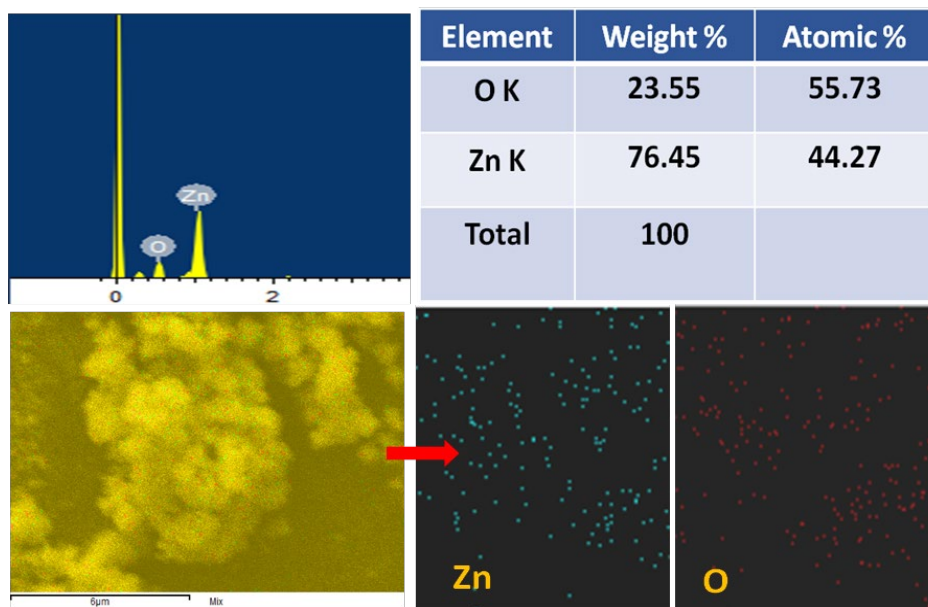

**Fig. S13** EDX spectrum and elemental mapping of **ZnO\_HT** obtained from hydrothermal reaction of Zn-CBS using water as solvent at 180 °C and pH > 13.

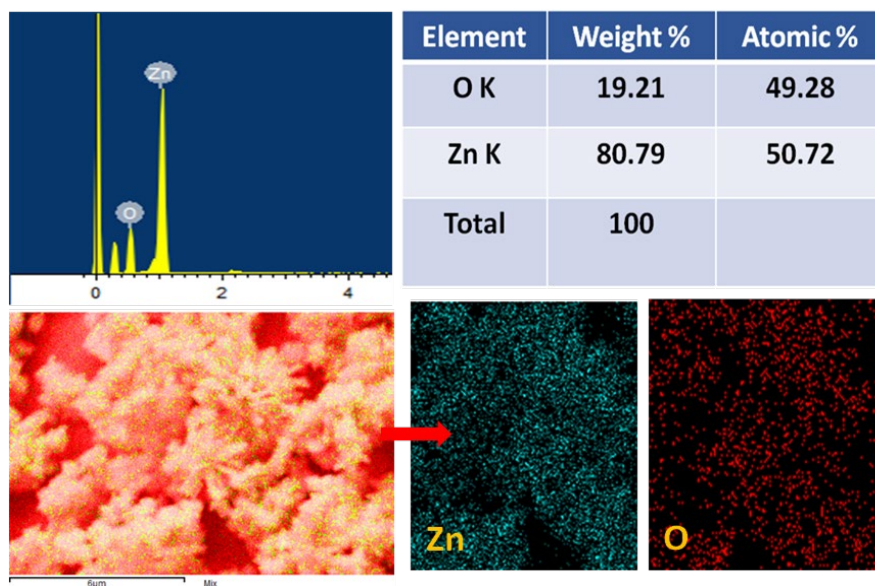

**Fig. S14** EDX spectrum and elemental mapping of **ZnO\_HT\_1** obtained from the calcination of **ZnO\_HT** at 600 °C for 6 h.

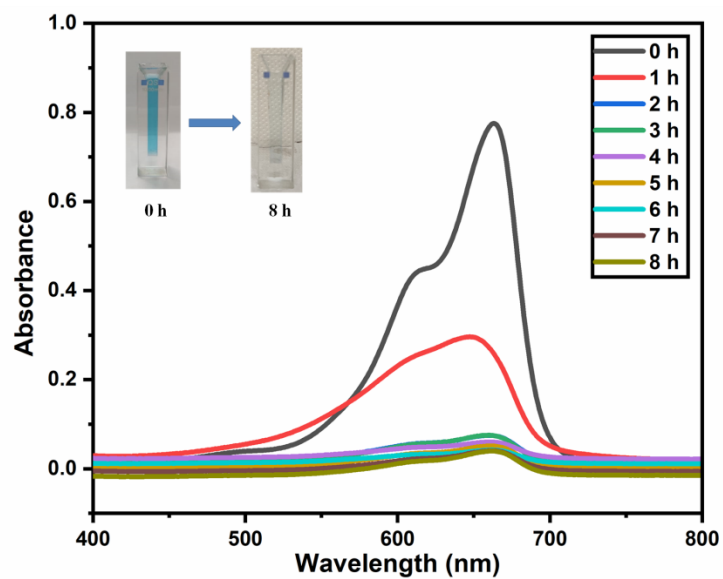

**Fig. S15** Change in the absorption spectra of the solution of MB in the presence of **ZnO<sub>3a</sub>**.

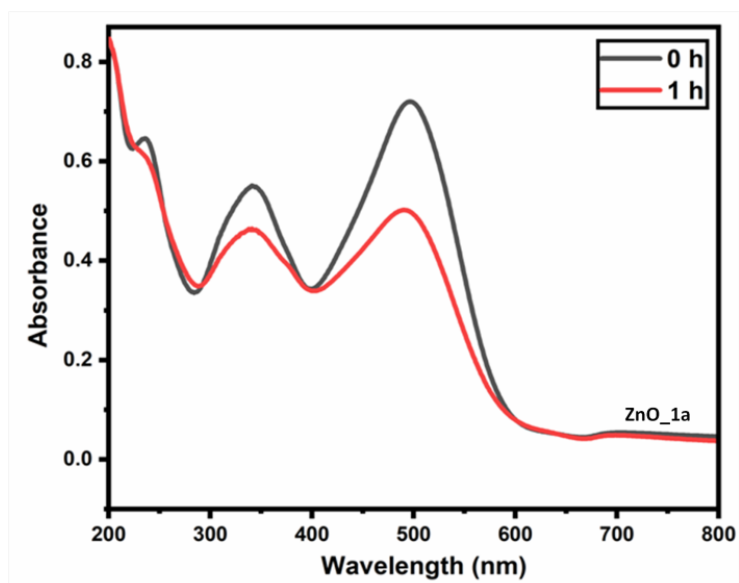

**Fig. S16** Change in the absorption spectra of the solution of CR in the presence of **ZnO<sub>1a</sub>**.

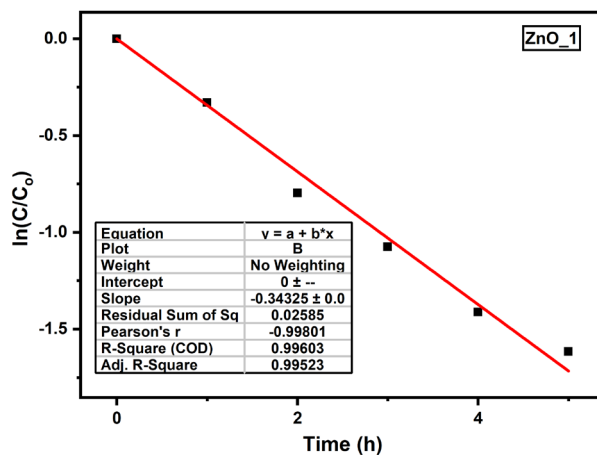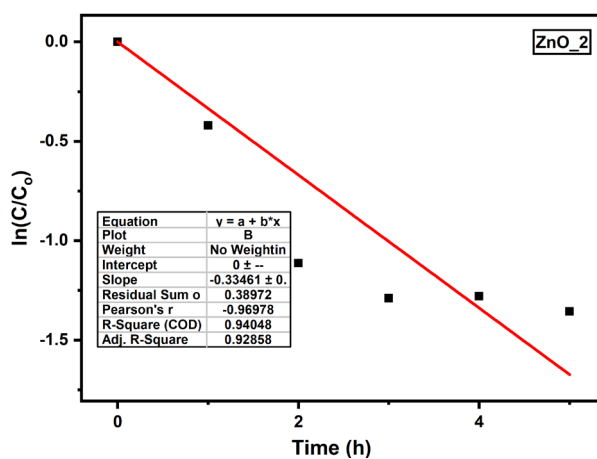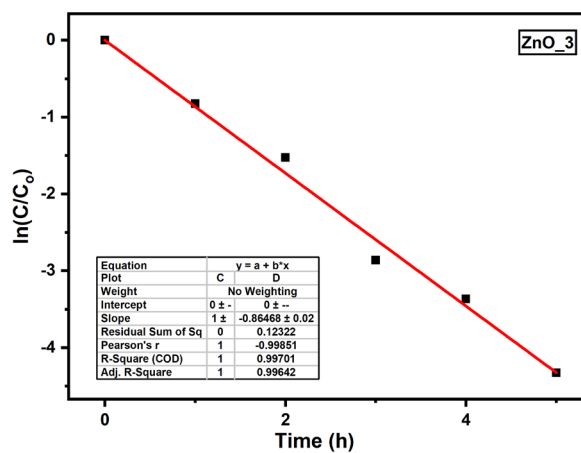

Fig. S17 Kinetic plot of ZnO\_1, ZnO\_2 and ZnO\_3 for degradation of MB dye.

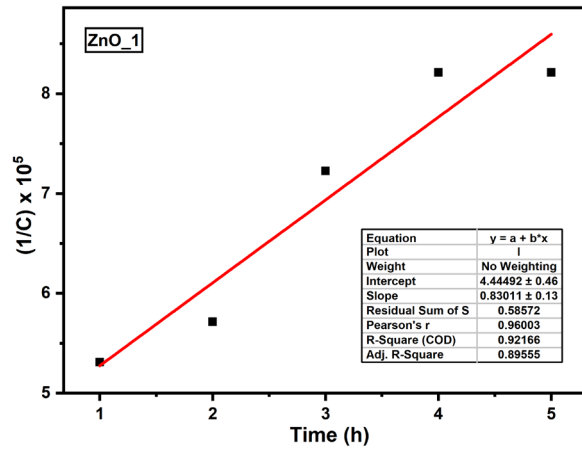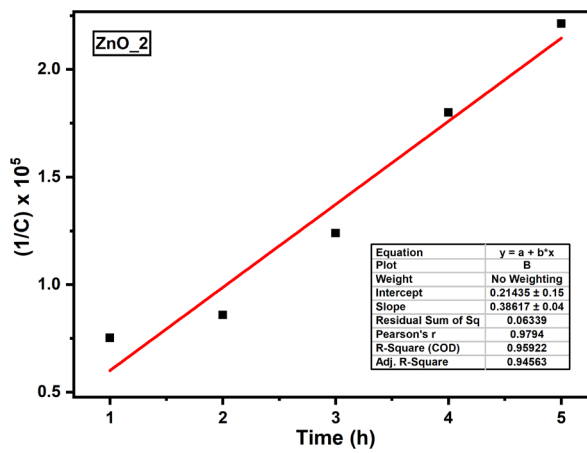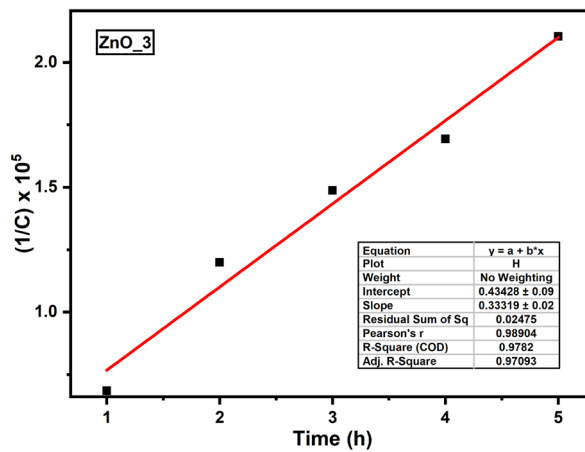

**Fig. S18** Kinetic plot of ZnO\_1, ZnO\_2 and ZnO\_3 for degradation of CR dye.

(a)

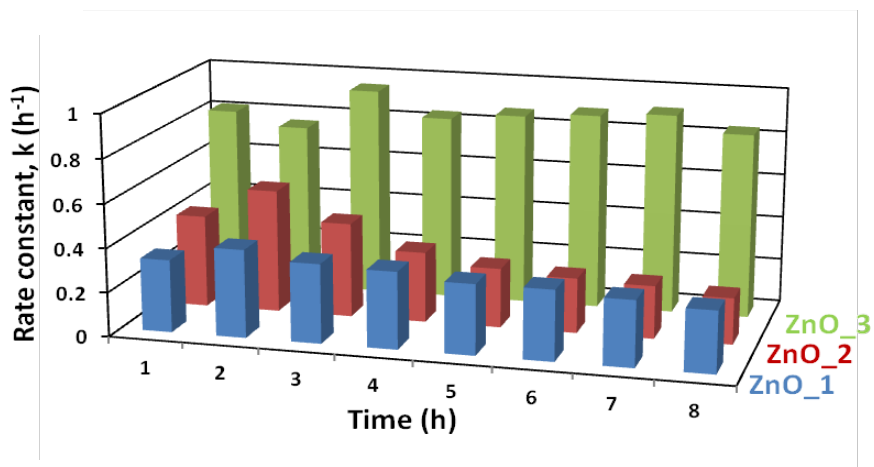

(b)

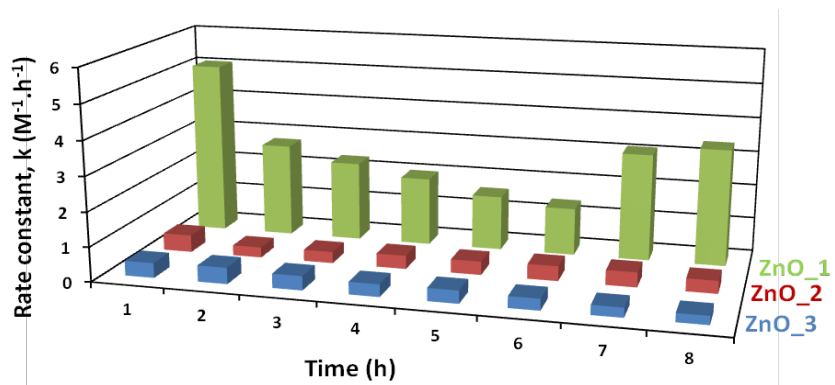

**Fig. S19** Comparison of rate constant for the degradation of (a) MB and (b) CR dye by ZnO\_1, ZnO\_2 and ZnO\_3.



**Percentage decolorization and rate constant values of as-synthesized ZnO nanoparticles**

**Table S1.** Degradation efficiency and rate constant values of the solution of MB in the presence of **ZnO\_1** under exposure of UV light at room temperature.

| <b>Time (h)</b> | <b>Degradation Efficiency (%)</b> | <b>Rate constant (h<sup>-1</sup>)</b> |
|-----------------|-----------------------------------|---------------------------------------|
| 0               | 0                                 | 0                                     |
| 1               | 28.08                             | 0.33                                  |
| 2               | 54.11                             | 0.40                                  |
| 3               | 64.41                             | 0.36                                  |
| 4               | 75.33                             | 0.35                                  |
| 5               | 80.46                             | 0.32                                  |
| 6               | 87.36                             | 0.32                                  |
| 7               | 89.90                             | 0.30                                  |
| 8               | 92.7                              | 0.28                                  |

**Table S2.** Degradation efficiency and rate constant values of the solution of MB in the presence of **ZnO<sub>2</sub>** under exposure of UV light at room temperature.

| <b>Time (h)</b> | <b>Degradation Efficiency (%)</b> | <b>Rate constant (h<sup>-1</sup>)</b> |
|-----------------|-----------------------------------|---------------------------------------|
| 0               | 0                                 | 0                                     |
| 1               | 53.9                              | 0.42                                  |
| 2               | 76.9                              | 0.56                                  |
| 3               | 80.2                              | 0.43                                  |
| 4               | 80.2                              | 0.32                                  |
| 5               | 81.9                              | 0.27                                  |
| 6               | 84.5                              | 0.25                                  |
| 7               | 87.2                              | 0.24                                  |
| 8               | 87.2                              | 0.21                                  |

**Table S3.** Degradation efficiency and rate constant values of the solution of MB in the presence of **ZnO\_3** under exposure of UV light at room temperature.

| <b>Time (h)</b> | <b>Degradation Efficiency (%)</b> | <b>Rate constant (h<sup>-1</sup>)</b> |
|-----------------|-----------------------------------|---------------------------------------|
| 0               | 0                                 | 0                                     |
| 1               | 56.1                              | 0.82                                  |
| 2               | 78.2                              | 0.76                                  |
| 3               | 94.3                              | 0.95                                  |
| 4               | 96.6                              | 0.84                                  |
| 5               | 98.7                              | 0.87                                  |
| 6               | 99.5                              | 0.89                                  |
| 7               | 99.8                              | 0.91                                  |
| 8               | 99.9                              | 0.84                                  |

**Table S4.** Degradation efficiency and rate constant values of the solution of CR in the presence of ZnO\_1 under exposure of UV light at room temperature.

| <b>Time (h)</b> | <b>Degradation Efficiency (%)</b> | <b>Rate constant (<math>M^{-1}h^{-1}</math>)</b> |
|-----------------|-----------------------------------|--------------------------------------------------|
| 0               | 0                                 | 0                                                |
| 1               | 95.2                              | 5.06                                             |
| 2               | 95.5                              | 2.73                                             |
| 3               | 96.5                              | 2.32                                             |
| 4               | 96.8                              | 1.99                                             |
| 5               | 96.8                              | 1.59                                             |
| 6               | 97                                | 1.38                                             |
| 7               | 98.8                              | 3.12                                             |
| 8               | 99.1                              | 3.39                                             |

**Table S5.** Degradation efficiency and rate constant values of the solution of CR in the presence of ZnO<sub>2</sub> under exposure of UV light at room temperature.

| <b>Time (h)</b> | <b>Degradation Efficiency (%)</b> | <b>Rate constant (M<sup>-1</sup>h<sup>-1</sup>)</b> |
|-----------------|-----------------------------------|-----------------------------------------------------|
| 0               | 0                                 | 0                                                   |
| 1               | 66.1                              | 0.50                                                |
| 2               | 70.33                             | 0.30                                                |
| 3               | 79.40                             | 0.33                                                |
| 4               | 85.84                             | 0.39                                                |
| 5               | 86.26                             | 0.39                                                |
| 6               | 91.09                             | 0.43                                                |
| 7               | 92.12                             | 0.43                                                |
| 8               | 92.10                             | 0.37                                                |

**Table S6.** Degradation efficiency and rate constant values of the solution of CR in the presence of ZnO\_3 under exposure of UV light at room temperature.

| <b>Time (h)</b> | <b>Degradation Efficiency (%)</b> | <b>Rate constant (M<sup>-1</sup>h<sup>-1</sup>)</b> |
|-----------------|-----------------------------------|-----------------------------------------------------|
| 0               | 0                                 | 0                                                   |
| 1               | 62.78                             | 0.43                                                |
| 2               | 78.72                             | 0.47                                                |
| 3               | 82.86                             | 0.41                                                |
| 4               | 84.93                             | 0.36                                                |
| 5               | 87.87                             | 0.37                                                |
| 6               | 88.64                             | 0.33                                                |
| 7               | 88.60                             | 0.28                                                |
| 8               | 88.73                             | 0.25                                                |



**Table S7.** Comparison of percentage degradation efficiency of MB dyes by the ZnO nanostructures with literature values.

| ZnO (morphology)                            | Time    | Degradation Efficiency (%) | Light source | Rate constant (k)                         | Ref.*     |
|---------------------------------------------|---------|----------------------------|--------------|-------------------------------------------|-----------|
| ZnO (Particles)                             | 70 min  | 93.25                      | Sunlight     | 0.0347 min <sup>-1</sup>                  | 46        |
| ZnO (Thin film)                             | 2.5 h   | 95                         | Sunlight     | 0.344 h <sup>-1</sup>                     | 47        |
| ZnO (Hexagonal prism)                       | 60 min  | 95                         | UV           | 0.093 min <sup>-1</sup>                   | 48        |
| ZnO (nano-pencils)                          | 4.5 h   | 95                         | Sunlight     | -                                         | 49        |
| ZnO (Hexagonal disks)                       | 240 min | 91.6                       | UV           | 8.30 x 10 <sup>-3</sup> min <sup>-1</sup> | 50        |
| ZnO (Dumbbell like- bipods)                 |         | 73.4                       |              | 4.40 x 10 <sup>-3</sup> min <sup>-1</sup> |           |
| ZnO (Rices)                                 |         | 100                        |              | 1.59 x 10 <sup>-2</sup> min <sup>-1</sup> |           |
| ZnO (Rods)                                  |         | 64.7                       |              | 3.30 x 10 <sup>-3</sup> min <sup>-1</sup> |           |
| ZnO-bpma-12 (nano-spheres)                  | 8 h     | 91                         | UV           | 0.00502 min <sup>-1</sup>                 | 51        |
| ZnO-bpea-12 (1D micro-rods)                 |         | 60                         |              | 0.00191 min <sup>-1</sup>                 |           |
| ZnO-bpta-12 (3D polyhedrons)                |         | 93                         |              | 0.00543 min <sup>-1</sup>                 |           |
| TiO <sub>2</sub> (Aggregated particles)     | 120 min | 97                         | UV           | 0.018 min <sup>-1</sup>                   | 52        |
| TiO <sub>2</sub> (Aggregated nanoparticles) | 9 h     | 85                         | UV           | -                                         | 53        |
| TiO <sub>2</sub> (NA)                       | 30 min  | 97                         | UV           | 0.44 min <sup>-1</sup>                    | 54        |
| TiO <sub>2</sub> (NA)                       | 180     | -                          | UV           | 0.0547 min <sup>-1</sup>                  | 55        |
| TiO <sub>2</sub> (Spherical particles)      | 90 min  | 96.8                       | Sunlight     |                                           | 56        |
| ZnO_1 (3D Microflowers)                     | 8 h     | 92.7                       | UV           | 0.34 h <sup>-1</sup>                      | This work |
| ZnO_2 (3D Polyhedrons)                      |         | 87.2                       |              | 0.33 h <sup>-1</sup>                      | This work |
| ZnO_3 (1D Nanorods)                         |         | 99.9                       |              | 0.86 h <sup>-1</sup>                      | This work |

\*reference number as appeared in the paper.

**Table S8** Comparison of percentage degradation efficiency of CR dye by the ZnO nanostructures with literature values.

| ZnO (morphology)        | Time    | Degradation Efficiency (%) | Light source | Rate constant (k)                                             | Ref.*     |
|-------------------------|---------|----------------------------|--------------|---------------------------------------------------------------|-----------|
| ZnO (Hollow flower)     | 50 min  | -                          | UV           | 0.02937 min <sup>-1</sup>                                     | 57        |
| ZnO (Nano-flower)       | 3 h     | 81                         | UV           | 0.92 x 10 <sup>-2</sup> min <sup>-1</sup>                     | 58        |
| ZnO (Nano-rods)         | 48 h    | 94.6                       | dark         | -                                                             | 59        |
| ZnO (Rod like)          | 30 min  | 99.21                      | UV           | 0.1119 min <sup>-1</sup>                                      | 60        |
| ZnO (Rod like)          | 100 min | 80                         | Visible      | -                                                             | 61        |
| ZnO (Flower-like)       |         | 65                         |              |                                                               |           |
| ZnO (Rod-flower like)   |         | 57                         |              |                                                               |           |
| ZnO (Particles-like)    |         | 51                         |              |                                                               |           |
| ZnO (Rod-like)          |         | 86                         | UV           |                                                               |           |
| ZnO (Flower-like)       |         | 71.5                       |              |                                                               |           |
| ZnO (Rod flower-like)   |         | 62                         |              |                                                               |           |
| ZnO (Particles-like)    | 54      |                            |              |                                                               |           |
| ZnO (Porous)            | 20 min  | 77.5                       | Blue LED     | 2.13 x 10 <sup>-2</sup> g mg <sup>-1</sup> .min <sup>-1</sup> | 62        |
| TiO <sub>2</sub> (NA)   | 180     | -                          | UV           | 0.0254 min <sup>-1</sup>                                      | 55        |
| TiO <sub>2</sub> (NA)   | 80 min  | 99.7                       | UV           | -                                                             | 53        |
| TiO <sub>2</sub> (NA)   | 30 min  | 66.99                      | UV           | -                                                             | 63        |
|                         |         | 64.72                      | Sunlight     | -                                                             |           |
| ZnO_1 (3D Microflowers) | 8 h     | 99.1                       | UV           | 0.83 M <sup>-1</sup> .h <sup>-1</sup>                         | This work |
| ZnO_2 (3D Polyhedrons)  |         | 92                         |              | 0.38 M <sup>-1</sup> .h <sup>-1</sup>                         | This work |
| ZnO_3 (1D Nanorods)     |         | 88.7                       |              | 0.33 M <sup>-1</sup> .h <sup>-1</sup>                         | This work |

\*reference number as appeared in the paper.

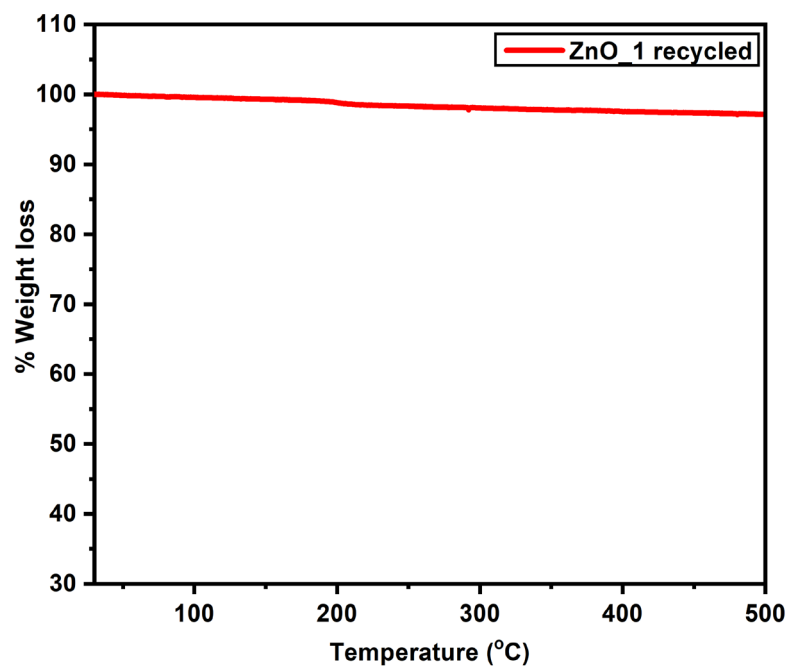

Fig. S20 TGA pattern of recycled ZnO\_1.

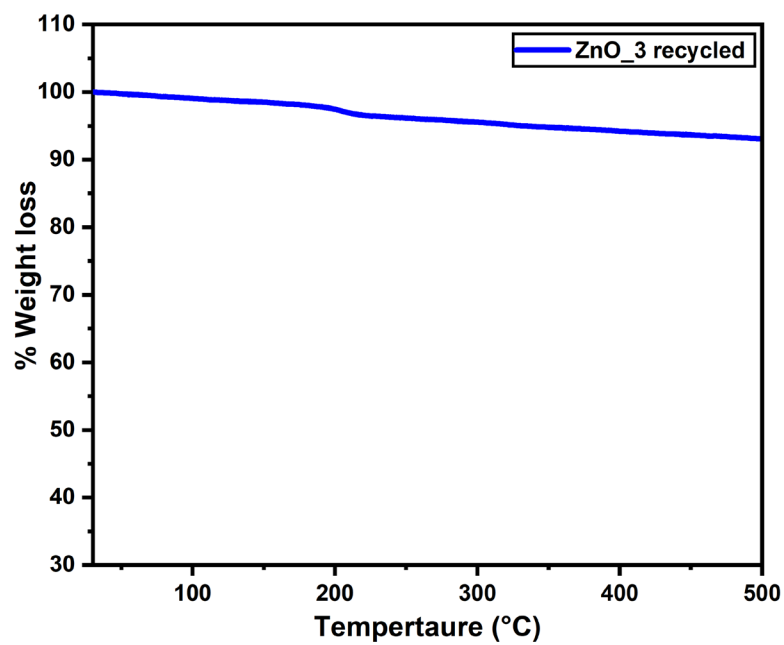

Fig. S21 TGA pattern of recycled ZnO\_3.
